# Supplementary figures and images for: MiRNA Deregulation Distinguishes Anaplastic Thyroid Carcinoma (ATC) and Supports Upregulation of Oncogene Expression
Source: MDPI journal article supplement (doi:10.3390/cancers13235913), 2021-11-24

# Hallmark GeneSets

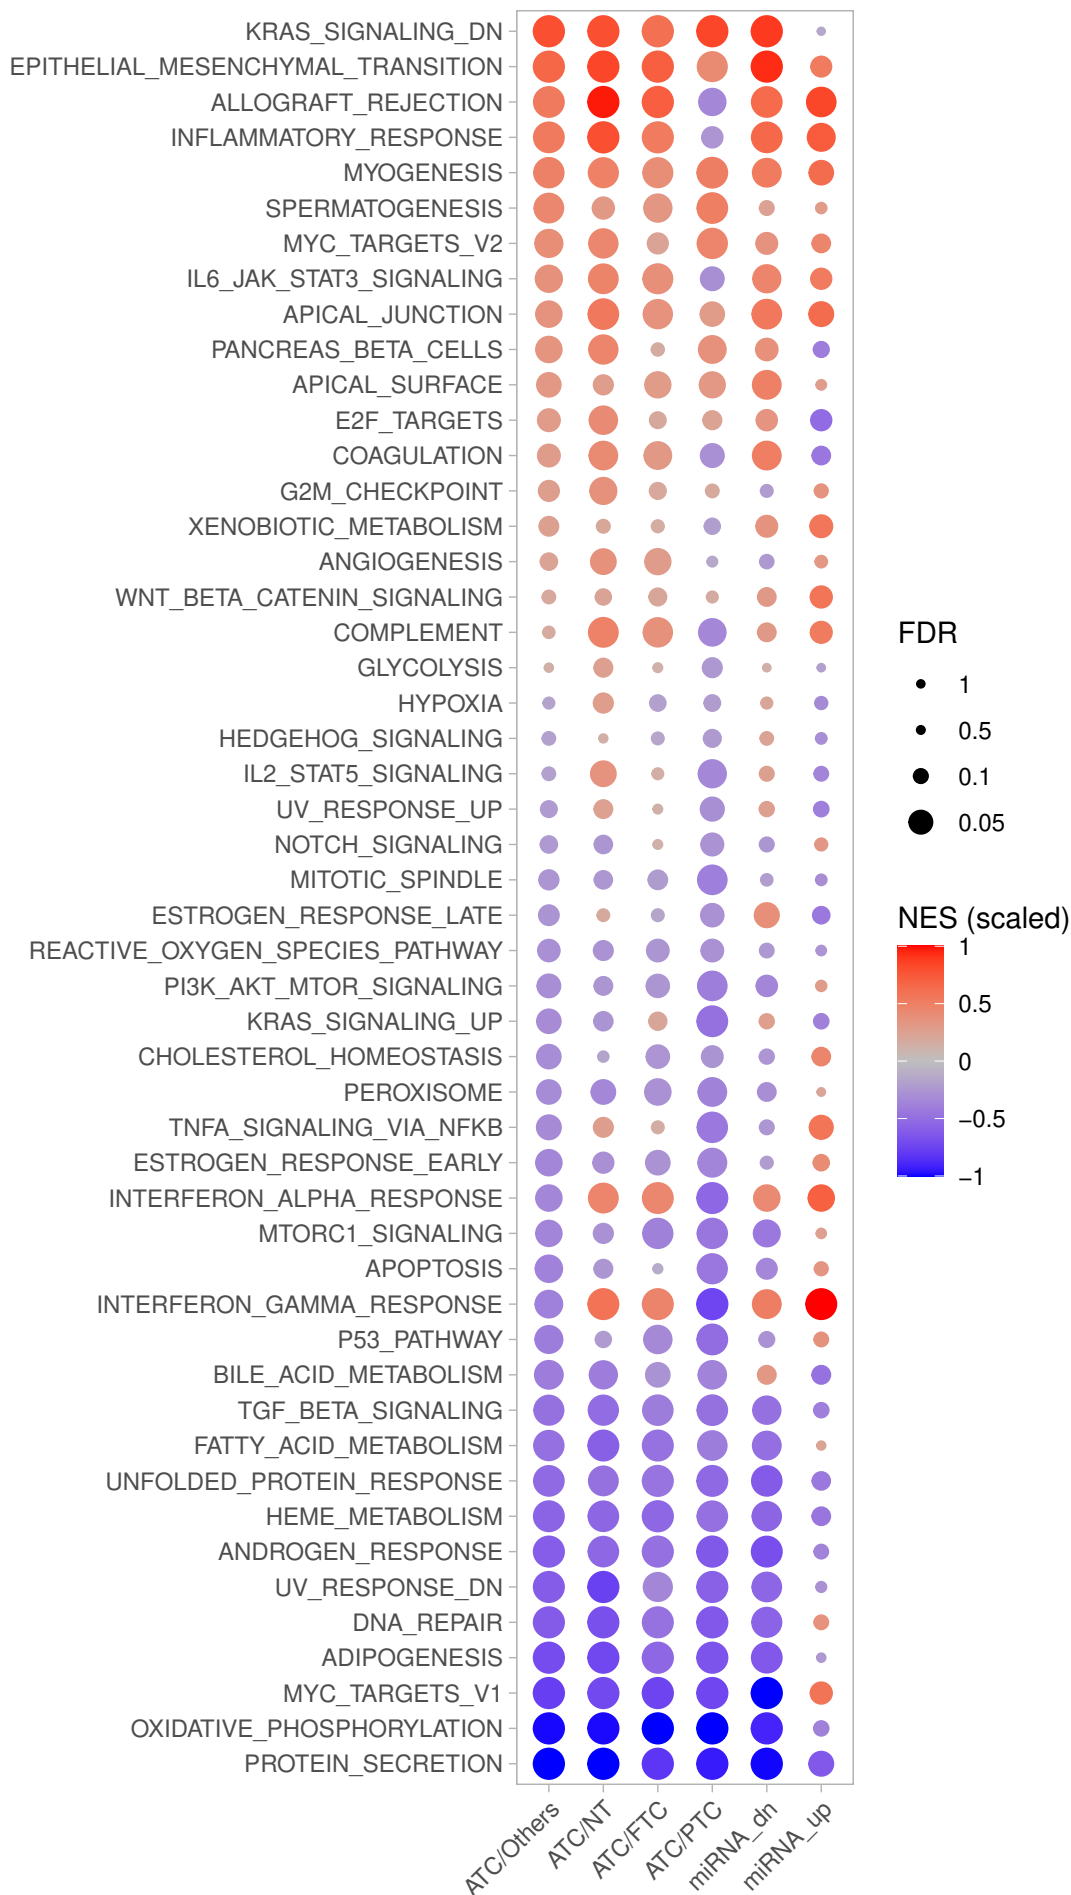

Supplement: s1 [file s1]
